# Supplementary material for: Influence of para substituents in controlling photophysical behavior and different non-covalent weak interactions in zinc complexes of a phenol based “end-off” compartmental ligand
Source: Royal Society of Chemistry journal article supplement (doi:10.1039/c5dt02768c), 2015-01-01
Supplement: c5dt02768c1.pdf [file c5dt02768c1.pdf]

## **Electronic supplementary information (ESI)**

### **Influence of para substituents in controlling photophysical behavior and different non-covalent weak interactions in zinc complexes of a phenol based “End-off” compartmental ligand**

Prateeti Chakraborty, <sup>a</sup> Jaydeep Adhikary, <sup>a</sup> Sugata Samanta, <sup>b</sup> Ishani Majumder, <sup>a</sup> Chiara Massera, <sup>c</sup> Daniel Escudero, <sup>\*, d</sup> Sanjib Ghosh, <sup>\*, b</sup> Antonio Bauza, <sup>e</sup> Antonio Frontera<sup>\*, e</sup> and Debasis Das<sup>\*, a</sup>

<sup>a</sup>*Department of Chemistry, University of Calcutta, 92 A. P. C. Road, Kolkata-700 009, India, E-mail: [dasdebasis2001@yahoo.com](mailto:dasdebasis2001@yahoo.com)*

<sup>b</sup>*Department of Chemistry, Presidency University, Kolkata-700073, India, E-mail: [pchemsg@gmail.com](mailto:pchemsg@gmail.com)*

<sup>c</sup>*Dipartimento di Chimica, University of Parma, Viale delle Scienze 17/A, 43124 Parma, Italy*

<sup>d</sup>*Chimie Et Interdisciplinarité, Synthèse, Analyse, Modélisation (CEISAM), UMR CNRS no. 6320, BP 92208, Université de Nantes, 2, Rue de la Houssinière, 44322 Nantes, Cedex 3, France. E-mail: [daniel.escudero@univ-nantes.fr](mailto:daniel.escudero@univ-nantes.fr)*

<sup>e</sup>*Departament de Química, Universitat de les Illes Balears, Crta. de Valldemossa km 7.5, 07122 Palma (Balears), Spain, E-mail: [toni.frontera@uib.es](mailto:toni.frontera@uib.es)*

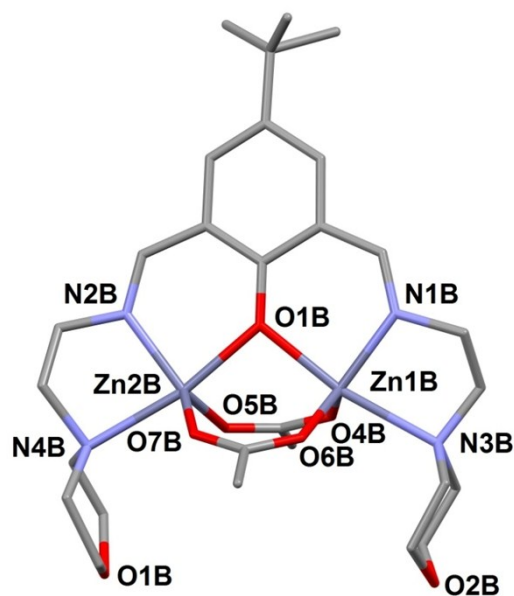

Figure S1. Molecular structure of the  $[Zn_2(L\text{-}t\text{butyl})(CH_3COO)_2]^+$  cation tagged B belonging to compound **2** with the partial atom numbering scheme. Hydrogen atoms have been omitted for clarity.

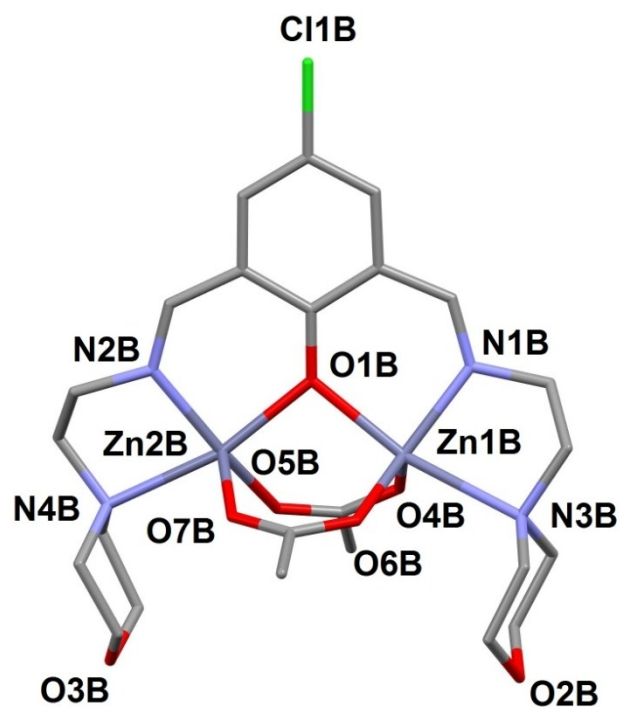

Figure S2. Molecular structure of the  $[\text{Zn}_2(\text{L-Cl})(\text{CH}_3\text{COO})_2]^+$  cation tagged B belonging to compound **3** with the partial atom numbering scheme. Hydrogen atoms have been omitted for clarity.

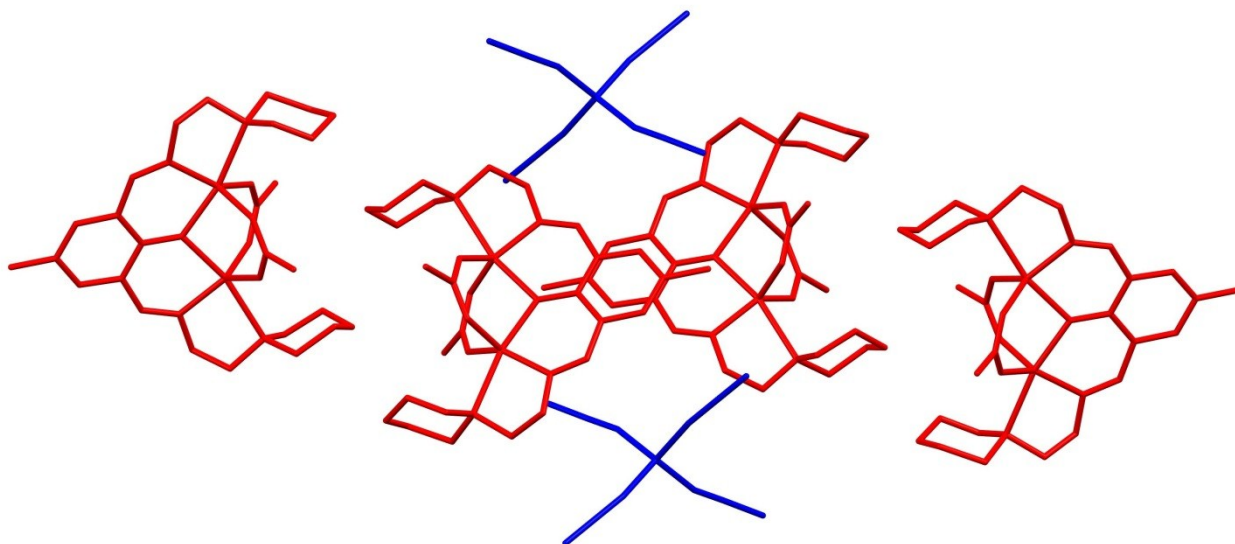

Figure S3. Unit cell content along the cell axis *b* for compound **1**. Complex  $[\text{Zn}_2(\text{L-Me})(\text{CH}_3\text{COO})_2]^+$ , red;  $[\text{Zn}(\text{SCN})_4]^{2-}$ , blue.

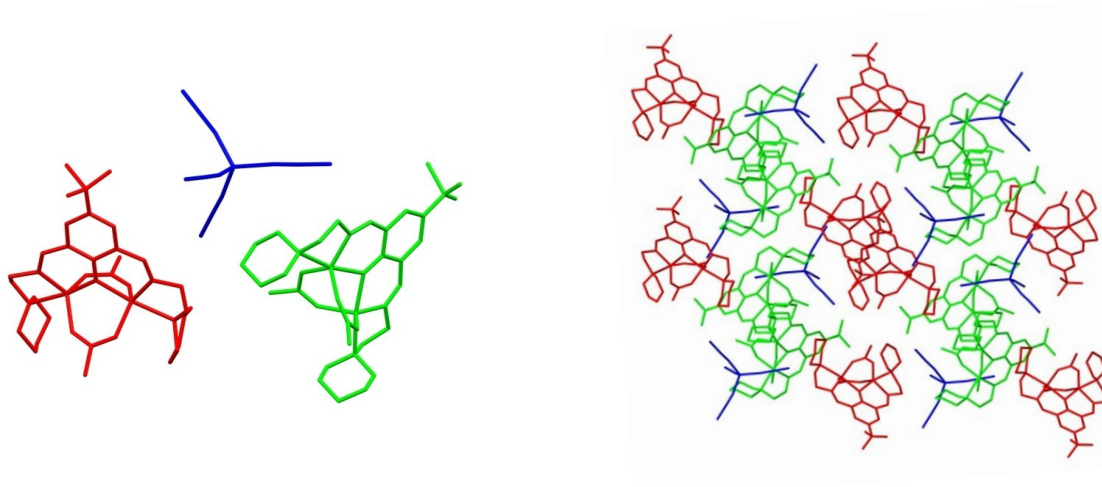

Figure S4. Asymmetric unit (left) and crystal packing along the cell axis *b* (right) for compound **2**. Complex A, green; Complex B, red;  $[\text{Zn}(\text{SCN})_4]^{2-}$ , blue.

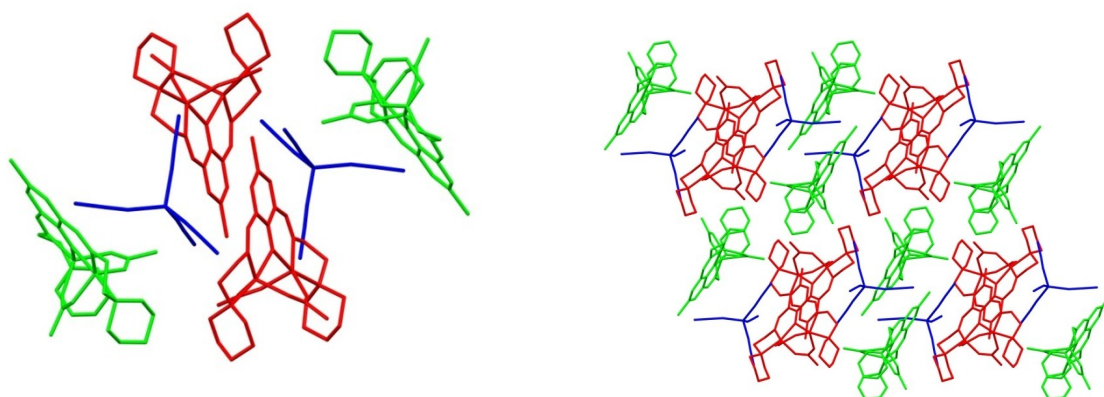

Figure S5. Unit cell content (left) and crystal packing along the cell axis *a* (right) for compound **3**. Complex A, green; Complex B, red;  $[\text{Zn}(\text{SCN})_4]^{2-}$ , blue.

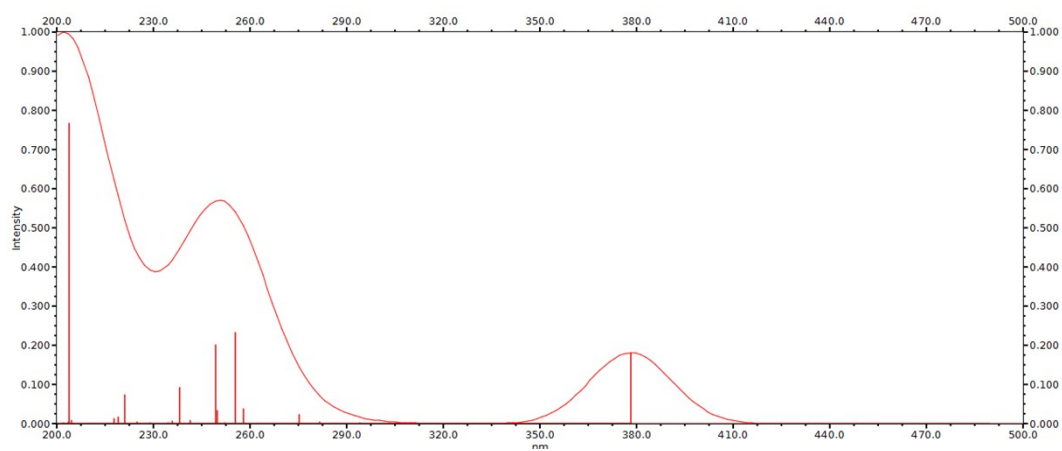

Figure S6. Computed PCM-TD-B3LYP UV-Vis absorption spectrum of Complex **1** (CI). The theoretical spectrum is convoluted with a Gaussian function with a full width at half-maximum (fwhm) of 15 nm; the corresponding transitions are marked with vertical lines.

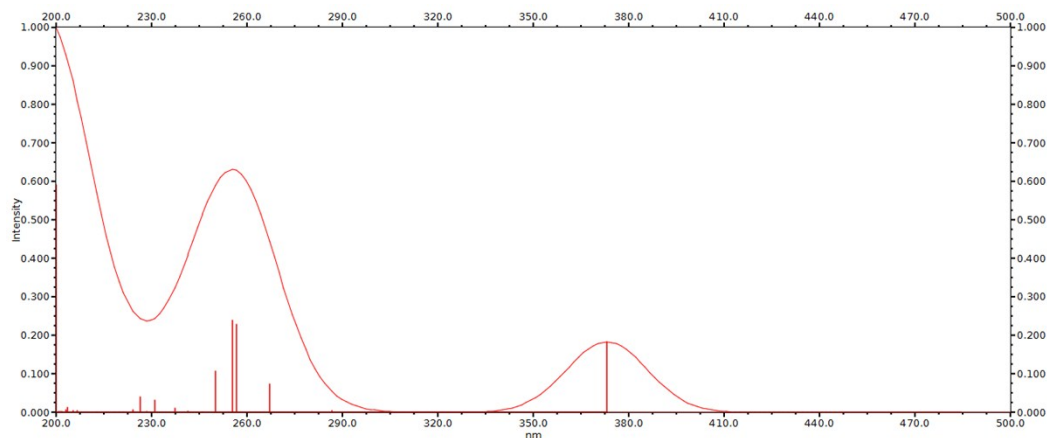

Figure S7. Computed PCM-TD-B3LYP UV-Vis absorption spectrum of Complex **2**. The theoretical spectrum is convoluted with a Gaussian function with a full width at half-maximum (fwhm) of 15 nm; the corresponding transitions are marked with vertical lines.

**Table S1.** Absorption and steady state fluorescence data of three complexes in methanol : dichloromethane - 1:1 (v/v) mixed solvent at 298K.

| Complex | $\lambda_{max}^{(A)}$ (nm)<br>$\epsilon$ ( $M^{-1}cm^{-1}$ ) | $\lambda_{max}^{(F)}$ (nm)<br>[ $\lambda_{ex}=390nm$ ] |
|---------|--------------------------------------------------------------|--------------------------------------------------------|
| 1       | 260.0<br>(5746.0)                                            | 447.0                                                  |
| 2       | 261.0<br>(16690.0)                                           | 443.0                                                  |
| 3       | 254.0<br>(5480.0)                                            | 455.0                                                  |

**Table S2.** Relative quantum yield in fluorescence and phosphorescence spectra

| Complex | Relative Fluorescence quantum yield<br>With respect to Complex 3 | Relative Phosphorescence quantum yield<br>With respect to Complex 2 |
|---------|------------------------------------------------------------------|---------------------------------------------------------------------|
| 1       | 0.77                                                             | 0.81                                                                |
| 2       | 0.72                                                             | 1.00                                                                |
| 3       | 1.00                                                             | 0.54                                                                |
